# Supplementary material for: NANoPoLC algorithm for correcting nanoparticle concentration by sample polydispersity
Source: Royal Society of Chemistry journal article supplement (doi:10.1039/c7nr08672e), 2018-01-01
Supplement: c7nr08672e2.xlsx [file c7nr08672e2.xlsx]

## Sheet: Cover
	NANoPoLC Algorithm for Correcting Nanoparticle Concentration by Sample Polydispersity
	Caitlin Lazurko,a,b† Manuel Ahumada,a,c† Francisco Valenzuela-Henriquez,d* and Emilio I. Alarcona,b*
	aBio-nanomaterials Chemistry and Engineering Laboratory, Division of Cardiac Surgery, University of Ottawa Heart Institute, 40 Ruskin Street, Rm H5229, Ottawa, Canada.
	bDepartment of Biochemistry, Microbiology, and Immunology, Faculty of Medicine, University of Ottawa, Ottawa, Canada. cCentro de Nanotecnología Aplicada,
	Facultad de Ciencias, Universidad Mayor, Chile. dInstituto de Matemática, Pontificia Universidad Católica de Valparaíso, Blanco Viel 596, Cerro Barón, Valparaíso, Chile.
	*Corresponding authors: Ealarcon@ottawaheart.ca & francisco.valenzuela@pucv.cl
	This file is an open access tool for determining nanoparticle size concentration
	A tutorial on how to use spreadsheet is found in the electronical supplementary information (ESI) file of our paper
	NAPoLC algorithm in next page ---------->

## Sheet: Algorithm 
This spreadsheet was established using the volume of a sphere. For other shapes please exchange V(di) calculation
*All values must be expressed in nanometers (nm)
		Experimental Data		NANoPoLC
		Presence percentage (pi)	Diameter (di; nm)	g(di)	V (di)	V atom	F(di)	hi	S(di)		Finite sum=	S(di)=	0
				0	0	0.00909699	0	0	0
				0	0	0.00909699	0	0	0		Initial concentration=	S0=	0.0002	M
				0	0	0.00909699	0	0	0
				0	0	0.00909699	0	0	0		Nanoparticle concentration=	[NP]=	#DIV/0!	M
				0	0	0.00909699	0	0	0
				0	0	0.00909699	0	0	0
				0	0	0.00909699	0	0	0
				0	0	0.00909699	0	0	0
				0	0	0.00909699	0	0	0
				0	0	0.00909699	0	0	0
				0	0	0.00909699	0	0	0
				0	0	0.00909699	0	0	0
				0	0	0.00909699	0	0	0
				0	0	0.00909699	0	0	0
				0	0	0.00909699	0	0	0
				0	0	0.00909699	0	0	0
				0	0	0.00909699	0	0	0
				0	0	0.00909699	0	0	0
				0	0	0.00909699	0	0	0
				0	0	0.00909699	0	0	0
				0	0	0.00909699	0	0	0
				0	0	0.00909699	0	0	0
				0	0	0.00909699	0	0	0
				0	0	0.00909699	0	0	0
				0	0	0.00909699	0	0	0
				0	0	0.00909699	0	0	0
				0	0	0.00909699	0	0	0
				0	0	0.00909699	0	0	0
				0	0	0.00909699	0	0	0
				0	0	0.00909699	0	0	0
				0	0	0.00909699	0	0	0
				0	0	0.00909699	0	0	0
				0	0	0.00909699	0	0	0
				0	0	0.00909699	0	0	0
				0	0	0.00909699	0	0	0
				0	0	0.00909699	0	0
				0	0	0.00909699	0	0
				0	0	0.00909699	0	0
				0	0	0.00909699	0	0
				0	0	0.00909699	0	0
				0	0	0.00909699	0	0
				0	0	0.00909699	0	0
				0	0	0.00909699	0	0
				0	0	0.00909699	0	0
				0	0	0.00909699	0	0
				0	0	0.00909699	0	0
				0	0	0.00909699	0	0
				0	0	0.00909699	0	0
				0	0	0.00909699	0	0
				0	0	0.00909699	0	0
				0	0	0.00909699	0	0
				0	0	0.00909699	0	0
				0	0	0.00909699	0	0
				0	0	0.00909699	0	0
				0	0	0.00909699	0	0
				0	0	0.00909699	0	0
				0	0	0.00909699	0	0
				0	0	0.00909699	0	0
				0	0	0.00909699	0	0
				0	0	0.00909699	0	0
				0	0	0.00909699	0	0
				0	0	0.00909699	0	0
				0	0	0.00909699	0	0
				0	0	0.00909699	0	0
				0	0	0.00909699	0	0
				0	0	0.00909699	0	0
				0	0	0.00909699	0	0
				0	0	0.00909699	0	0
				0	0	0.00909699	0	0
				0	0	0.00909699	0	0
				0	0	0.00909699	0	0
				0	0	0.00909699	0	0
				0	0	0.00909699	0	0
				0	0	0.00909699	0	0
				0	0	0.00909699	0	0
				0	0	0.00909699	0	0
				0	0	0.00909699	0	0
				0	0	0.00909699	0	0
				0	0	0.00909699	0	0
				0	0	0.00909699	0	0
				0	0	0.00909699	0	0
				0	0	0.00909699	0	0
				0	0	0.00909699	0	0
				0	0	0.00909699	0	0
				0	0	0.00909699	0	0
				0	0	0.00909699	0	0
				0	0	0.00909699	0	0
				0	0	0.00909699	0	0
				0	0	0.00909699	0	0
				0	0	0.00909699	0	0
				0	0	0.00909699	0	0
				0	0	0.00909699	0	0
				0	0	0.00909699	0	0
				0	0	0.00909699	0	0
				0	0	0.00909699	0	0
				0	0	0.00909699	0	0
				0	0	0.00909699	0	0
				0	0	0.00909699	0	0
				0	0	0.00909699	0	0
				0	0	0.00909699	0	0
				0	0	0.00909699	0	0
				0	0	0.00909699	0	0
				0	0	0.00909699	0	0
				0	0	0.00909699	0	0
				0	0	0.00909699	0	0
				0	0	0.00909699	0	0
				0	0	0.00909699	0	0
				0	0	0.00909699	0	0
				0	0	0.00909699	0	0
				0	0	0.00909699	0	0
				0	0	0.00909699	0	0
				0	0	0.00909699	0	0
				0	0	0.00909699	0	0
				0	0	0.00909699	0	0
				0	0	0.00909699	0	0
				0	0	0.00909699	0	0
				0	0	0.00909699	0	0
				0	0	0.00909699	0	0
				0	0	0.00909699	0	0
				0	0	0.00909699	0	0
				0	0	0.00909699	0	0
				0	0	0.00909699	0	0
				0	0	0.00909699	0	0
				0	0	0.00909699	0	0
				0	0	0.00909699	0	0
				0	0	0.00909699	0	0
				0	0	0.00909699	0	0
				0	0	0.00909699	0	0
				0	0	0.00909699	0	0
				0	0	0.00909699	0	0
				0	0	0.00909699	0	0
				0	0	0.00909699	0	0
				0	0	0.00909699	0	0
				0	0	0.00909699	0	0
				0	0	0.00909699	0	0
				0	0	0.00909699	0	0
				0	0	0.00909699	0	0
				0	0	0.00909699	0	0
				0	0	0.00909699	0	0
				0	0	0.00909699	0	0
				0	0	0.00909699	0	0
				0	0	0.00909699	0	0
				0	0	0.00909699	0	0
				0	0	0.00909699	0	0
				0	0	0.00909699	0	0
				0	0	0.00909699	0	0
				0	0	0.00909699	0	0
				0	0	0.00909699	0	0
				0	0	0.00909699	0	0
				0	0	0.00909699	0	0
				0	0	0.00909699	0	0
				0	0	0.00909699	0	0
				0	0	0.00909699	0	0
				0	0	0.00909699	0	0
				0	0	0.00909699
	Sum of Data pi =	0

## Sheet: Example
This spreadsheet was established using the volume of a sphere. For other shapes please exchange V(di) calculation
*All values must be expressed in nanometers (nm)
		Experimental Data		NANoPoLC
		Presence percentage (pi)	Diameter (di; nm)	g(di)	V (di)	V atom	F(di)	hi	S(di)		Finite sum=	S(di)=	2.14248e+06
		3.8	3.122	3.8	15.933	0.00909699	1751.46	0.493	21914.4
		13.9	3.615	13.9	24.7357	0.00909699	2719.1	0.572	75267.7		Initial concentration=	S0=	0.0002	M
		22.2	4.187	22.2	38.4333	0.00909699	4224.83	0.662	158532
		22.2	4.849	22.2	59.6974	0.00909699	6562.32	0.766	241158		Nanoparticle concentration=	[NP]=	9.33497e-11	M
		16.6	5.615	16.6	92.6932	0.00909699	10189.4	0.888	297786
		10.5	6.503	10.5	143.993	0.00909699	15828.6	1.028	314908
		5.7	7.531	5.7	223.644	0.00909699	24584.3	1.19	298504
		2.9	8.721	2.9	347.294	0.00909699	38176.8	1.379	258982
		1.3	10.1	1.3	539.464	0.00909699	59301.4	1.6	211844
		0.6	11.7	0.6	838.603	0.00909699	92184.6	1.84	154350
		0.2	13.54	0.2	1299.73	0.00909699	142875	2.15	109234
		0.1	15.69	0.1	2022.4	0.00909699	222315			<----	Last value must be erased
				0	0	0.00909699	0	0	0
				0	0	0.00909699	0	0	0
				0	0	0.00909699	0	0	0
	Sum of Data pi =	100
